# Supplementary material for: Genomic and metabolomic insights into Trichoderma harzianum T9, a resilient biocontrol fungus from arid environments
Source: Research Square preprint supplement (doi:10.21203/rs.3.rs-7456804/v1), 2025-09-03
Supplement: Supplementary file 1 [file 9eaa169be1a5efcc517b97eb.docx]

**Genomic and metabolomic insights into *Trichoderma harzianum* T9, a resilient biocontrol fungus from arid environments**

Francisco Vargas-Gasca1, Enrique Pola-Sánchez5, Ana Valeria García-Lartigue5, Alan D. Gomez-Vargas2, Pablo Cruz-Morales3, Ana Calheiros de Carvalho3, Daniela Rago3, Linda Ahonen3, Elva Teresa Aréchiga-Carvajal4, José Manuel Villalobos-Escobedo5,6*, and Vianey Olmedo-Monfil1*.

**Supplementary material**


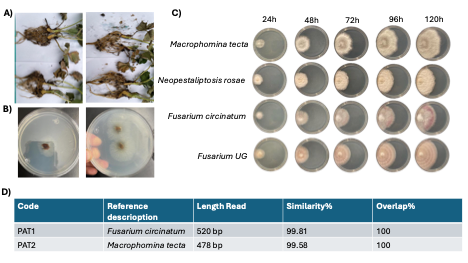


**Supplementary Figure 1.** Isolation of highly aggressive pathogenic fungal strains from strawberry plants. A) Strawberry seedlings infected with pathogenic fungi. B) Isolation of phytopathogenic fungi from leaves on PDA medium. C) Pathogenic fungal strains isolated from strawberry plants. D) Identification of two isolated strains from strawberry plants using the ITS fragment and BLAST analysis against the NCBI database.


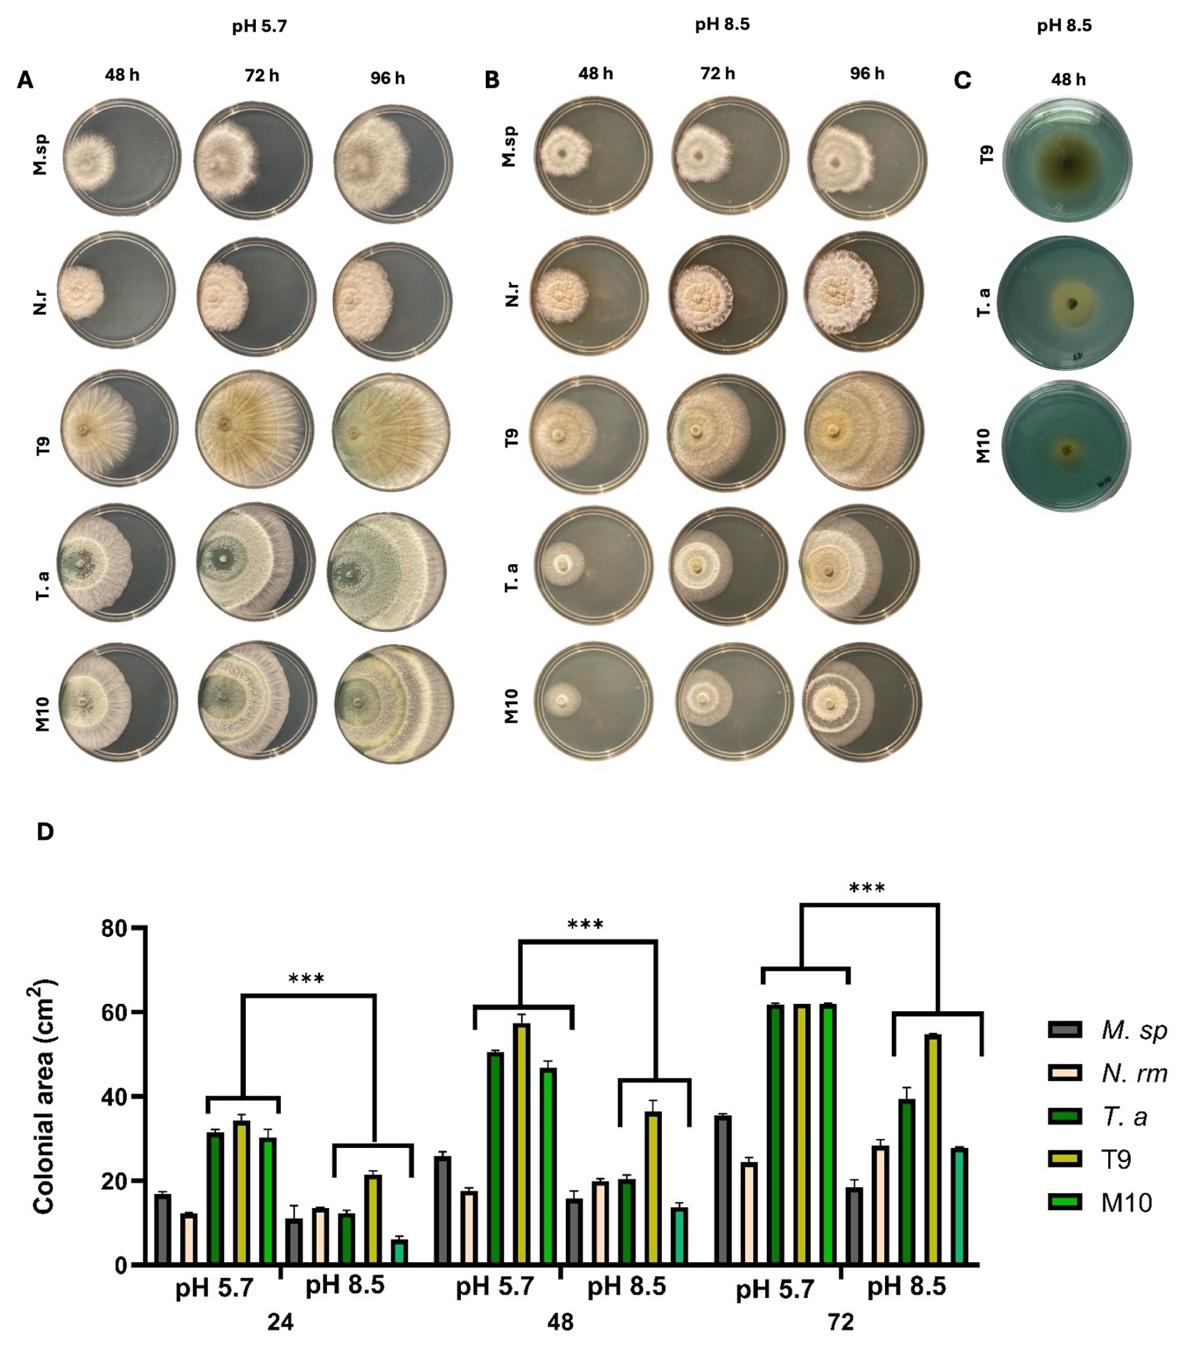


**Supplementary Figure 2.** *T. harzianum* strain T9 exhibits superior growth under extreme alkaline conditions. Colony growth of the pathogens *Macrophomina* sp. (M.sp) and *Neopestalioptosis rosae* (N.r), along with *Trichoderma harzianum* T9, *T. harzianum* M10, and *T. atroviride* IMI206040 (T.a) on PDA medium at pH 5.7 (A) or pH 8.5 (B). Photographs were taken at 48, 72, and 96 hours of incubation. Colony growth of *T. harzianum* T9, *T. harzianum* M10, and *T. atroviride* IMI206040 (T.a) on PDA medium at pH 8.5 with bromothymol blue as a pH indicator (C). Comparison of the average colony area of *Trichoderma* strains and phytopathogens grown on PDA medium at pH 5.7 and 8.5 (D). Asterisks indicate statistical differences according to the Tukey-HSD test at a significance level of α < 0.05, with *p < 0.05. n=3.


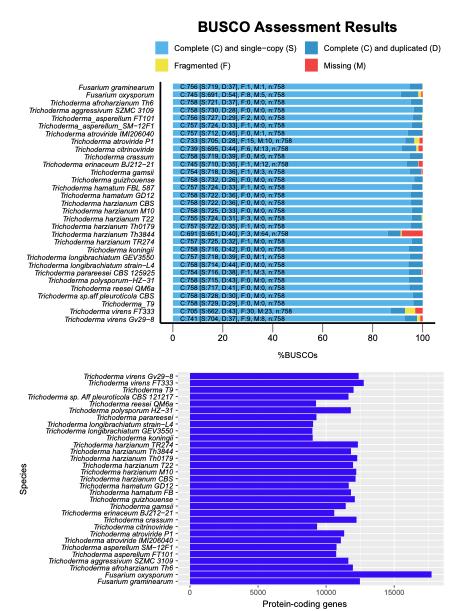


**Supplementary Figure 3.** (A) Genome quality analysis using BUSCO (Benchmarking Universal Single-Copy Orthologs) of the fungi dataset, based on exons extracted with gffread. (B) amount of protein predicted in each genome used in this work.


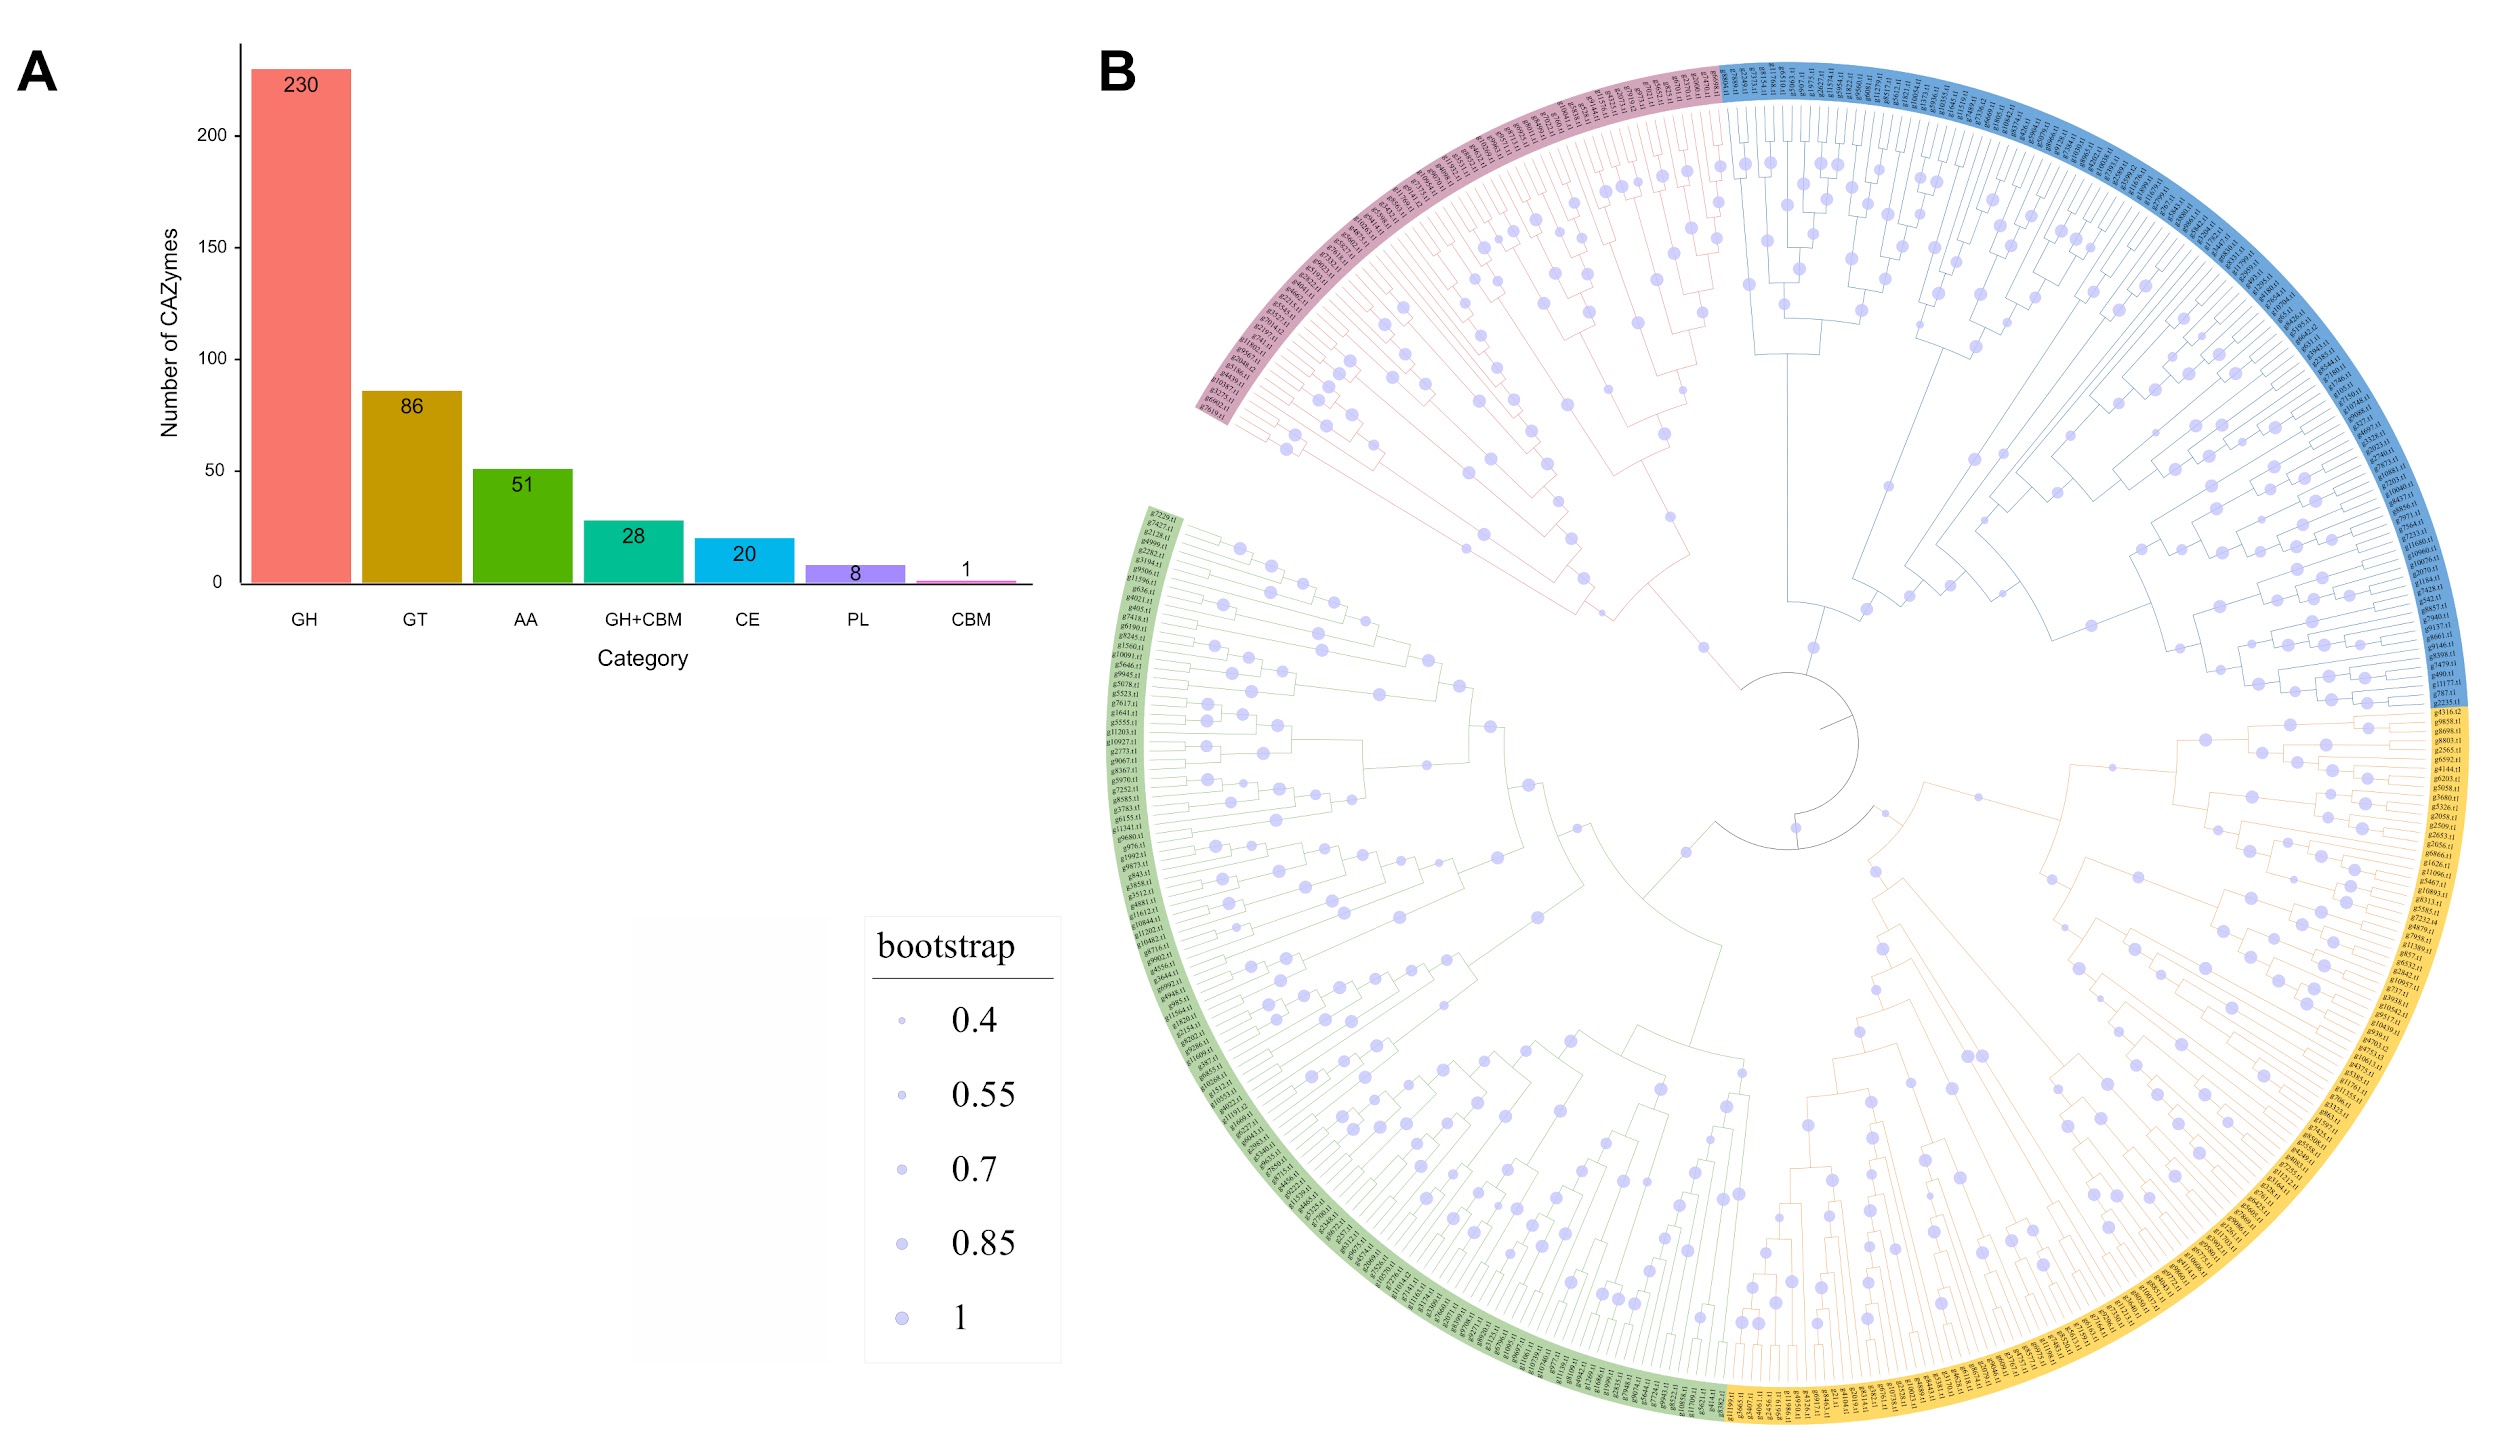


**Supplementary Figure 4.** Identification of CAZymes in the genome of *T. harzianum* T9. The identified CAZymes include GH (Glycoside Hydrolases), GT (Glycosyltransferases), PL (Polysaccharide Lyases), CE (Carbohydrate Esterases), CBM (Carbohydrate-Binding Modules), and AA (Auxiliary Activities). A) Number of CAZymes found in each group. B) Phylogenetic distribution of CAZymes with signal peptide.

**Table S1.** Unpublished genomes submitted to open access databases.

| Species | Webpage |
| --- | --- |
| *Trichoderma erinaceum* | <https://www.ncbi.nlm.nih.gov/nuccore/JALIRY000000000.1> |
| *Trichoderma konin* | <https://www.ncbi.nlm.nih.gov/nuccore/BCGH00000000.1> |
| *Trichoderma crasum* | <https://mycocosm.jgi.doe.gov/Tricr1/Tricr1.home.html> |
| *Trichoderma pleuroticola* | <https://mycocosm.jgi.doe.gov/Trichpleur1/Trichpleur1.home.html> |
| *Trichoderma aggressivum* | <https://mycocosm.jgi.doe.gov/Triag1/Triag1.home.html> |
| *Trichoderma harzianum* M10 | <https://mycocosm.jgi.doe.gov/TriharM10_1/TriharM10_1.home.html> |
| *Trichoderma afroharzianum* | <https://www.ncbi.nlm.nih.gov/nuccore/2707202863> |
| *Trichoderma harzianum* T22 | <https://mycocosm.jgi.doe.gov/TriharT22_1/TriharT22_1.home.html> |

**Table S2.-** Summary of *de novo* genome assembly statistics for *Trichoderma harzianum* T9 utilizing next-generation sequencing technologies and assembly tools.

| **Statistic** | **Trichoderma_T9** |
| --- | --- |
| contigs | 142 |
| contigs (>= 0 bp) | 142 |
| contigs (>= 1000 bp) | 130 |
| Largest contig | 2547181 |
| Total length | 39853892 |
| Total length (>= 0 bp) | 39853892 |
| Total length (>= 1000 bp) | 39846154 |
| N50 | 903272 |
| GC (%) | 48.24 |
| Mismatches | - |
| # N's per 100 kbp | 0 |
| # N's | 0 |

**Table S3.-** Summary of TEs annotations.

| **Classification** | **Total length (bp)** | **Count** | **Proportion (%)** | **Number of distinct classifications** |
| --- | --- | --- | --- | --- |
| DNA Transposon | 73359 | 89 | 0.184069852 | 2 |
| LINEs | 179531 | 97 | 0.450472943 | 1 |
| LTRs | 919979 | 377 | 2.308379317 | 8 |
| Other (Simple Repeat, Microsatellite, RNA) | 430285 | 9851 | 1.07965616 | 2624 |
| Unclassified | 613216 | 1191 | 1.538660264 | 26 |
| Sum | 2216370 | 11605 | 5.561238536 | 2661 |

**
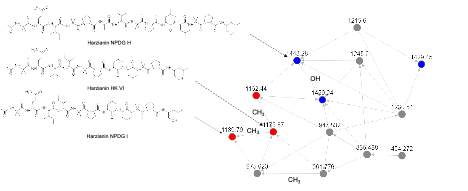
**

**Supplementary Figure 5.** Analysis of the ion network with the highest abundance in the samples and the largest number of residues detected in the metabolome. The colors in the circles indicate the species in which each ion from the network was detected.

**Table S4.-** Mass spectrometry peaks associated with the compound Harzianin.

| Compound CID | Name | Molecular formula [M+H]+ | Accurate mass [M+H]+ | Exact mass  [M+H]+ | Error (ppm) |
| --- | --- | --- | --- | --- | --- |
| CID: 85176069 | Harzianin HK VI | C58H102N12O13 | 1175.7762 | 1175.7768 | 0.5 |
| CID: 164623695 | Harzianin NPDG I | C59H104N12O13 | 1189.7918 | 1189.7924 | 0.5 |
| CID: 164624124 | Harzianin NPDG H | C71H123N15O16 | 1142.9344 | 1442.9350 | 0.4 |
| CID: 164609972 | Harzianin NPDG D | C70H121N15O17 | 1444.9154 | 1444.9143 | 0.7 |
| CID: 164618139 | Harzianin NPDG F | C70H121N15O16 | 1428.9198 | 1428.9194 | 0.2 |
| CID: 164627999 | Harzianin NPDG B | C69H119N15O17 | 1430.8982 | 1430.8987 | 0.3 |
| CID: 164617195 | Harzianin NPDG E | C69H119N15O16 | 1414.9030 | 1414.9037 | 0.5 |


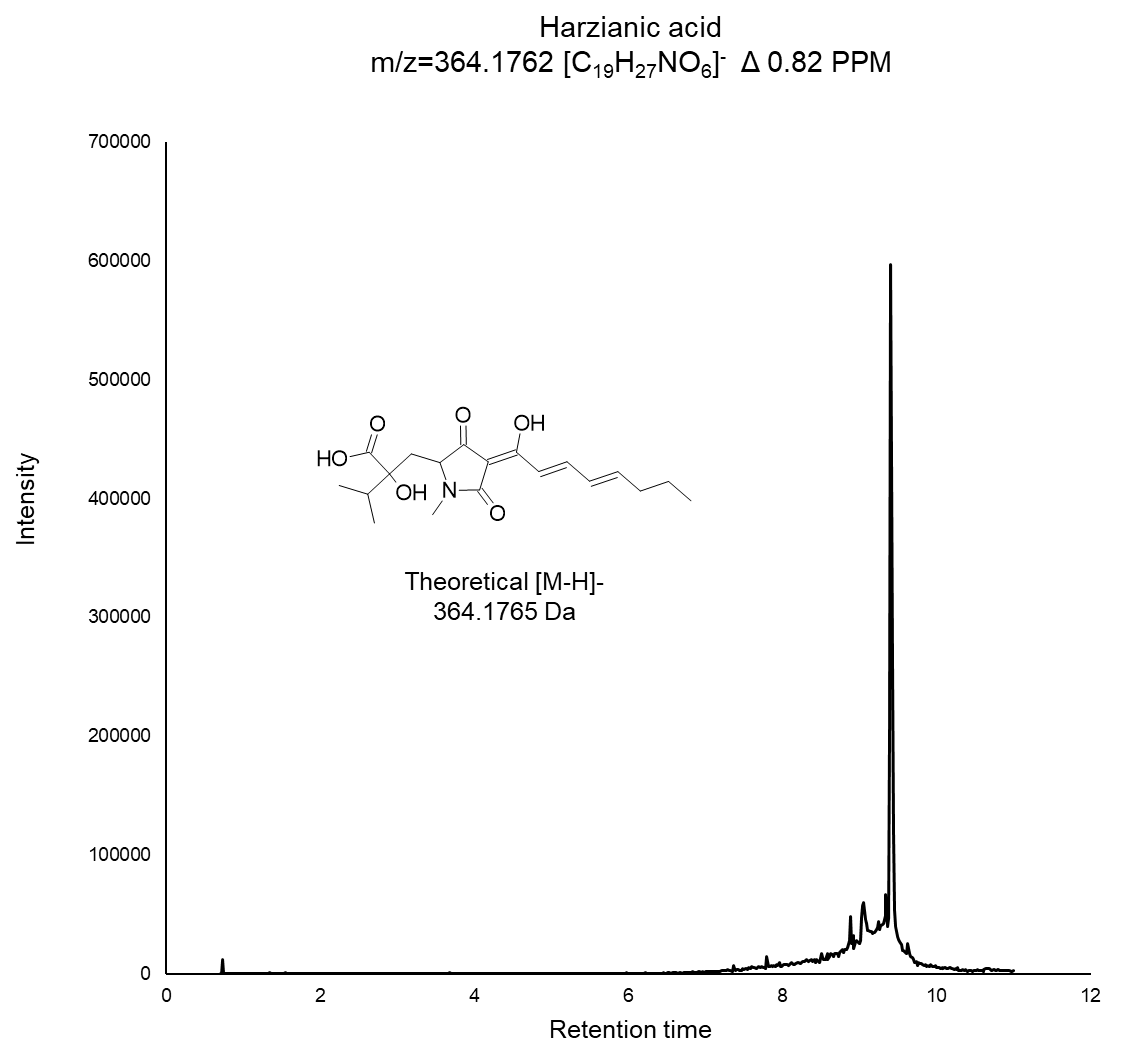


**Supplementary Figure 6.** Mass spectrum of the peak and molecular structure corresponding to the metabolite Harzianic acid, with a molecular weight of 364.1765 Da, detected in T9.


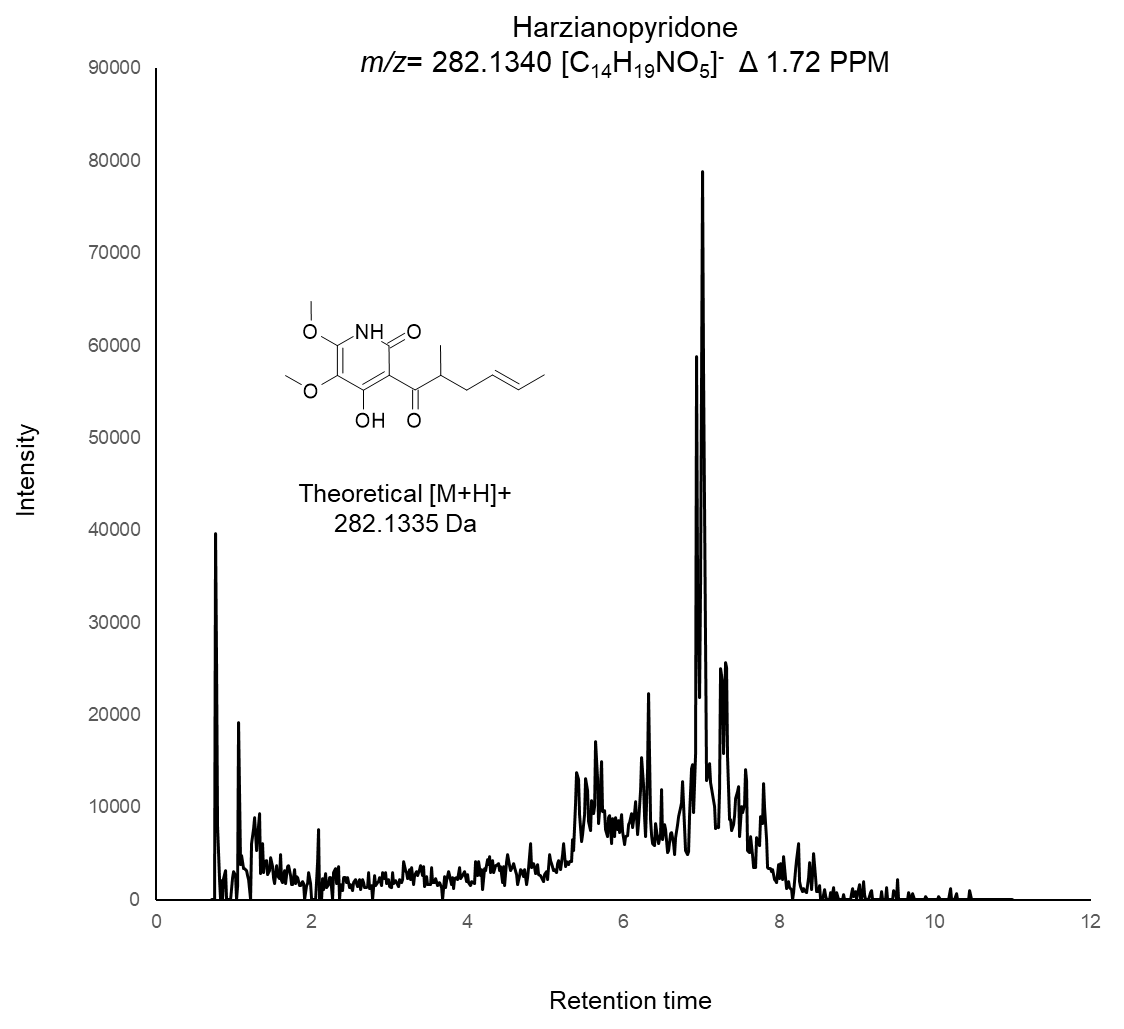


**Supplementary Figure 7.** Mass spectrum of the peak and molecular structure corresponding to the metabolite Harzianopyridone, with a molecular weight of 282.1335 Da, detected in T9.


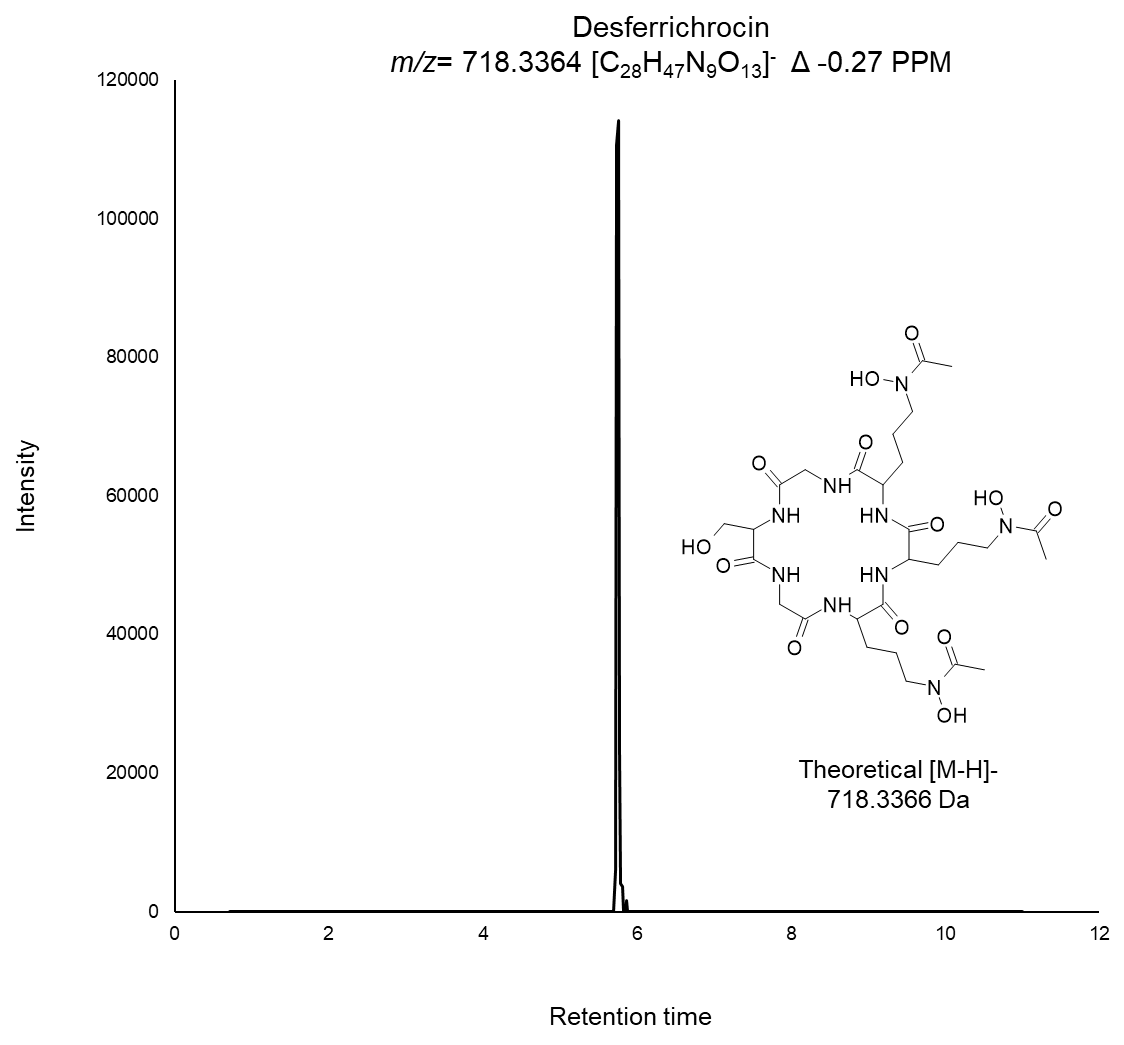


**Supplementary Figure 8.** Mass spectrum of the peak and molecular structure corresponding to the metabolite Desferrichrocin, with a molecular weight of 718.3366 Da, detected in T9.


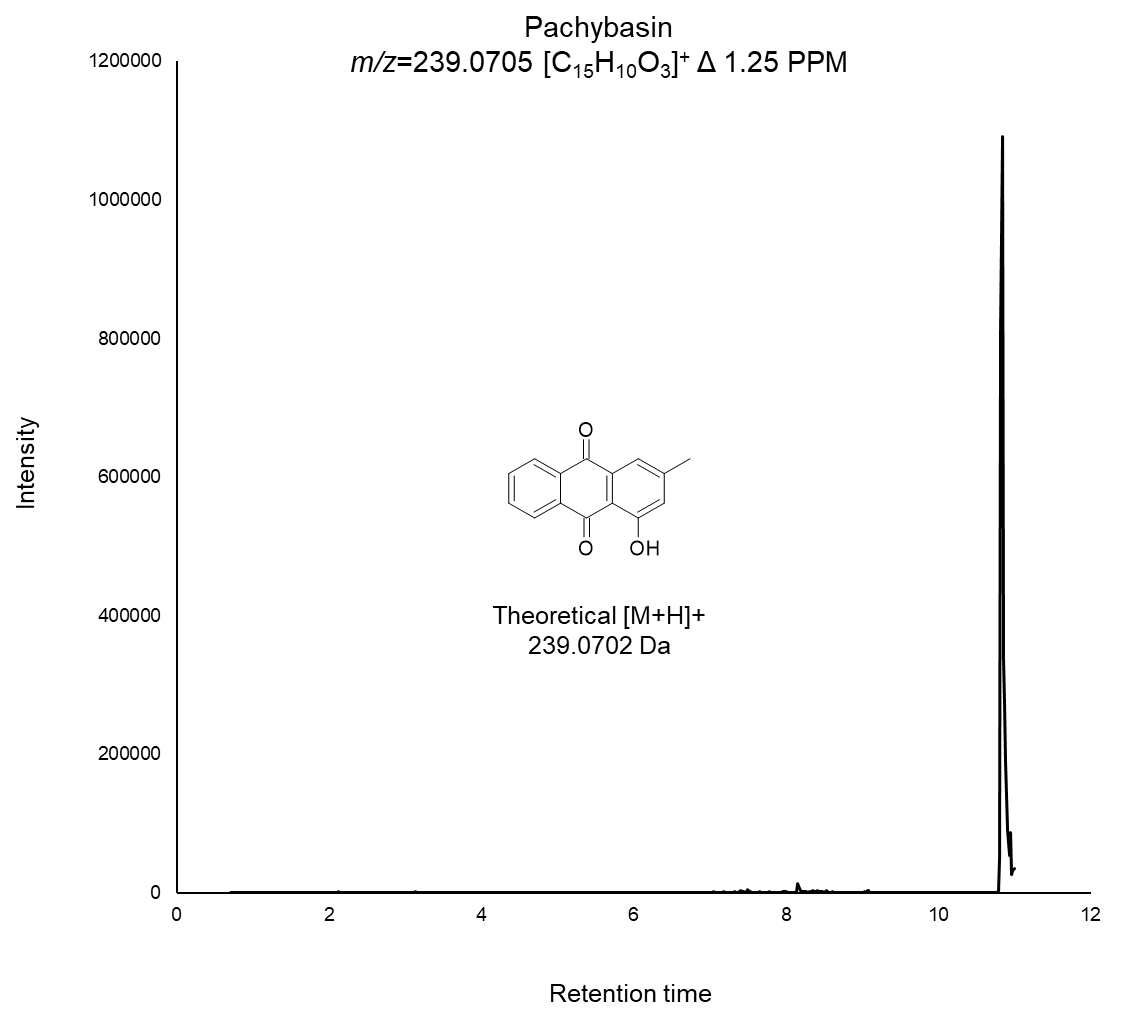


**Supplementary Figure 9.** Mass spectrum of the peak and molecular structure corresponding to the metabolite Pachybasin, with a molecular weight of 239.0702 Da, detected in T9.


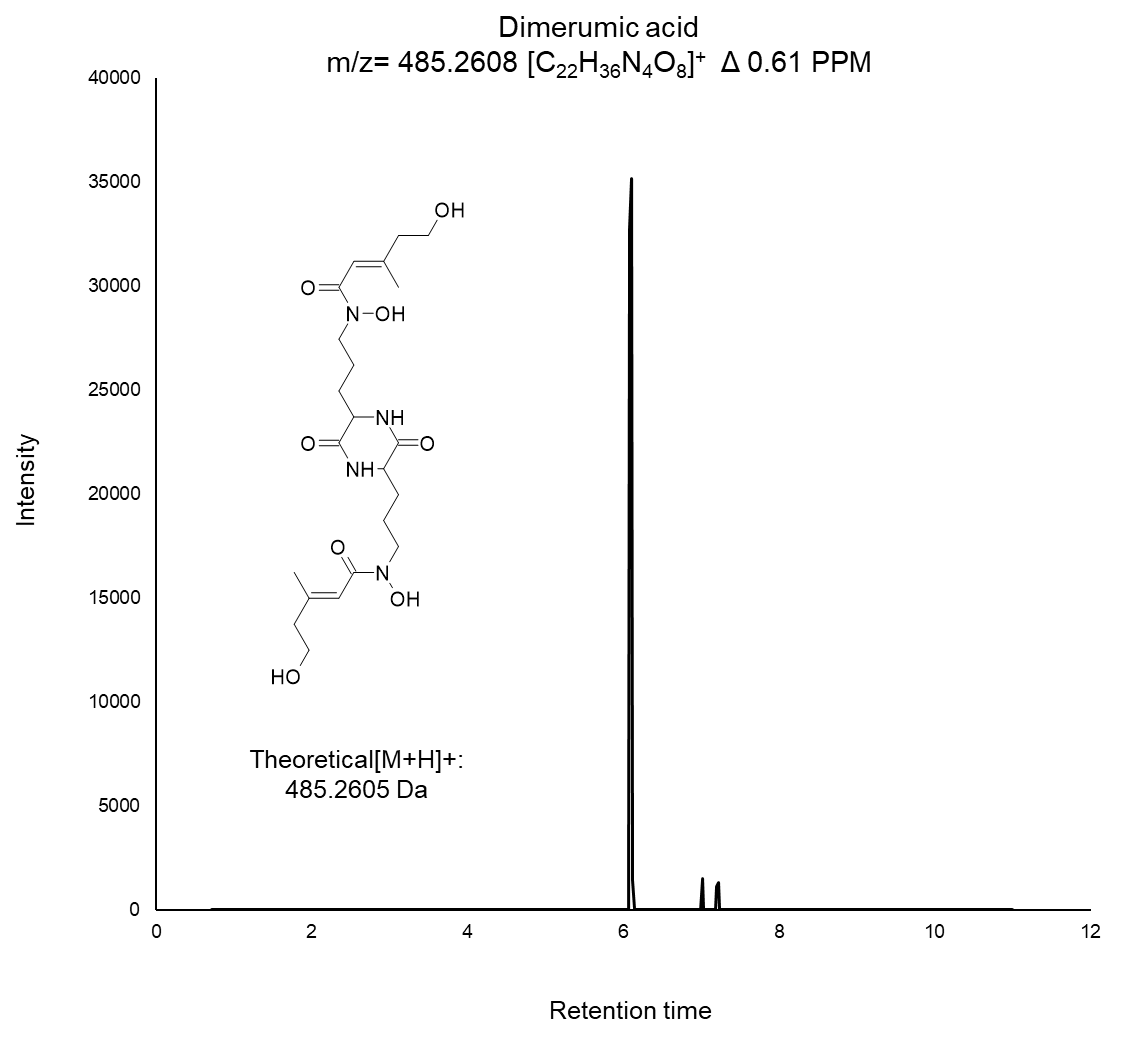


**Supplementary Figure 10.** Mass spectrum of the peak and molecular structure corresponding to the metabolite Dimerumic acid, with a molecular weight of 485.2605 Da, detected in T9.


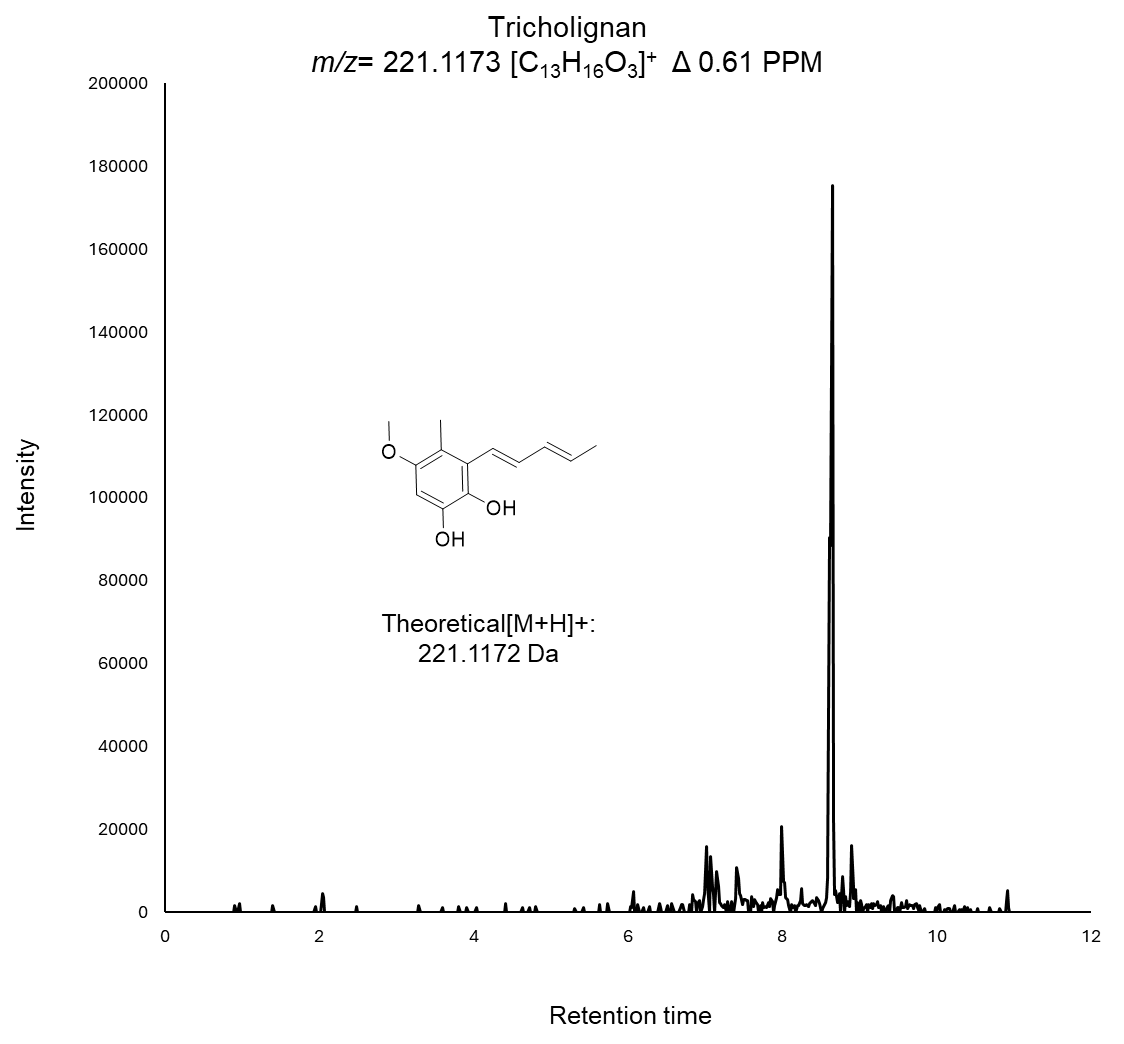


**Supplementary Figure 11.** Mass spectrum of the peak and molecular structure corresponding to the metabolite Tricholignan, with a molecular weight of 221.1172 Da, detected in T9.

**Table S5.-** Correlation between Biosynthetic Gene Clusters (BGCs) identified in the *T. harzianum* T9 genome and compounds detected via Mass Spectrometry.

| **Region** | **Type** | **From** | **To** | **Detected by mass spectrometry** | **Predicted product** |
| --- | --- | --- | --- | --- | --- |
| 19.2 | NRPS | 566,965 | 612,382 | Dimerumic acid |  |
| 4.2 | T1PKS | 562,363 | 609,956 | trichoxide |  |
| 11.1 | fungal-RiPP-like,T1PKS | 5,285 | 85,346 | tricholignan A |  |
| 27.1 | T1PKS,NRPS, betalactone | 363,457 | 415,321 | harzianopyridone |  |
| 7.2 | NRPS | 1,183,311 | 1,242,378 | Desferrichrocin |  |
| 5.1 | T1PKS, NRPS | 27,622 | 117,710 | Harzianins, 11 and 14 membered petaibols |  |
| 2.2 | T1PKS | 1,530,995 | 1,579,214 |  |  |
| 20.1 | fungal-RiPP-like, NRPS-like | 268,517 | 347,744 |  | choline |
| 77.1 | NRPS | 9,410 | 35,247 |  |  |
| 37.2 | NRPS | 163,570 | 210,423 |  | verticillin or related |
| 14.2 | NRPS, T1PKS | 482,056 | 582,131 |  | dichlorodiaporthin and potentially others |
| 7.3 | terpene | 1,283,135 | 1,304,646 |  |  |
| 34.1 | NRPS, T1PKS | 12,164 | 88,239 |  |  |
| 3.4 | terpene | 1,478,830 | 1,500,425 |  |  |
| 49.1 | NRPS, T1PKS | 97,139 | 149,638 |  | phyllostictines or related |
| 37.1 | T1PKS | 69,495 | 116,664 |  |  |
| 48.1 | NRPS, T1PKS,fungal-RiPP-like | 104,335 | 190,426 |  | fujikurins or related |
| 14.1 | T1PKS | 192,390 | 239,089 |  | aurofusarin |
| 10.2 | T1PKS | 431,163 | 479,919 |  |  |
| 10.1 | T1PKS | 351,822 | 399,612 |  | Citrinin or related |
| 8.2 | T1PKS | 871,697 | 919,405 |  |  |
| 1.1 | fungal-RiPP-like | 499,109 | 561,913 |  |  |
| 1.2 | NRPS-like | 2,423,654 | 2,466,956 |  |  |
| 1.3 | NRPS | 2,503,091 | 2,547,181 |  |  |
| 2.1 | T1PKS | 924,929 | 973,540 |  |  |
| 2.3 | NRPS | 1,973,495 | 2,020,165 |  |  |
| 3.1 | T1PKS | 482,674 | 530,706 |  |  |
| 3.2 | T1PKS | 790,766 | 838,790 |  |  |
| 3.3 | terpene | 1,124,834 | 1,146,207 |  |  |
| 4.1 | terpene | 237,765 | 259,263 |  |  |
| 5.2 | NRPS | 1,355,454 | 1,398,872 |  |  |
| 7.1 | fungal-RiPP-like, NRPS-like,isocyanide | 1,060,309 | 1,142,850 |  |  |
| 7.4 | NRPS,T1PKS | 1,362,592 | 1,415,218 |  |  |
| 8.1 | T1PKS | 184,290 | 231,948 |  |  |
| 8.3 | T1PKS | 1,112,551 | 1,158,025 |  |  |
| 8.4 | NRPS | 1,256,064 | 1,315,720 |  |  |
| 10.3 | fungal-RiPP | 786,310 | 833,759 |  |  |
| 10.4 | NRPS | 982,309 | 1,029,130 |  |  |
| 11.2 | fungal-RiPP-like | 262,474 | 331,006 |  |  |
| 11.3 | fungal-RiPP-like | 608,823 | 670,074 |  |  |
| 12.1 | terpene | 664,524 | 685,869 |  |  |
| 12.2 | NRPS-like | 890,044 | 935,262 |  |  |
| 14.3 | terpene | 777,094 | 798,689 |  |  |
| 15.1 | terpene | 257,074 | 278,248 |  |  |
| 15.2 | fungal-RiPP-like, NRPS-like | 345,952 | 442,983 |  |  |
| 18.1 | NRPS-like | 219,651 | 263,151 |  |  |
| 19.1 | NRPS-like | 102,167 | 145,256 |  |  |
| 20.2 | terpene | 393,713 | 414,981 |  |  |
| 22.1 | T1PKS | 408,416 | 455,351 |  |  |
| 28.1 | fungal-RiPP-like | 449,347 | 510,075 |  |  |
| 29.1 | fungal-RiPP-like | 347,136 | 410,994 |  |  |
| 34.2 | T1PKS | 311,926 | 360,477 |  |  |
| 35.1 | isocyanide-nrp | 84,901 | 140,140 |  |  |
| 38.1 | terpene | 124,784 | 146,462 |  |  |
| 40.1 | fungal-RiPP-like | 122,578 | 183,415 |  |  |
| 42.1 | NRPS,T1PKS | 1 | 83,788 |  | Trichorzianines |
| 45.1 | NRPS-like | 193,879 | 237,734 |  |  |
| 47.1 | T1PKS | 55,605 | 97,184 |  |  |
| 47.2 | T1PKS | 150,669 | 200,562 |  |  |
| 53.1 | NRPS,fungal-RiPP-like,T1PKS | 33,289 | 131,620 |  |  |
| 64.1 | fungal-RiPP-like | 1 | 67,585 |  |  |
| 81.1 | NRPS | 1 | 34,176 |  |  |
| Undetermined | PKS | Undetermined | Undetermined | Pachybasin |  |
